# Supplementary material for: Packing and mobility of hydrocarbon chains in phospholipid lyotropic liquid crystalline lamellar phases and liposomes: characterisation by positron annihilation lifetime spectroscopy (PALS)
Source: Royal Society of Chemistry journal article supplement (doi:10.1039/c4cp03822c), 2014-11-20
Supplement: c4cp03822c1.pdf [file c4cp03822c1.pdf]

**Packing and Mobility of Hydrocarbon Chains in Phospholipid Lyotropic Liquid Crystalline Lamellar Phases and Liposomes, Characterised Using Positron Annihilation Lifetime Spectroscopy (PALS)**

Aurelia W. Dong,<sup>1,2</sup> Celesta Fong,<sup>2</sup> Lynne J. Waddington,<sup>3</sup> Anita J. Hill,<sup>4</sup> Ben J Boyd<sup>1,5</sup> \* and Calum J. Drummond<sup>2,6</sup> .

<sup>1</sup> Drug Delivery, Disposition and Dynamics, Monash Institute of Pharmaceutical Sciences, Monash University (Parkville Campus), 381 Royal Parade, Parkville, VIC 3052, Australia

<sup>2</sup> CSIRO Manufacturing Flagship, 343 Royal Parade, Parkville, VIC 3052, Australia

<sup>3</sup> CSIRO Manufacturing Flagship, Private Bag 33, Clayton, VIC 3169, Australia

<sup>4</sup> CSIRO Manufacturing, Productivity and Services, PO Box 312, Clayton, VIC 3169, Australia

<sup>5</sup> ARC Centre of Excellence in Convergent Bio-Nano Science and Technology, Monash Institute of Pharmaceutical Sciences, Monash University (Parkville Campus), 381 Royal Parade, Parkville, VIC 3052, Australia

<sup>6</sup> School of Applied Sciences, College of Science Engineering and Health, GPO Box 2476, RMIT University, Melbourne, VIC 3001, Australia

Corresponding Authors: [calum.drummond@rmit.edu.au](mailto:calum.drummond@rmit.edu.au); [ben.boyd@monash.edu](mailto:ben.boyd@monash.edu)

## Supplementary Information

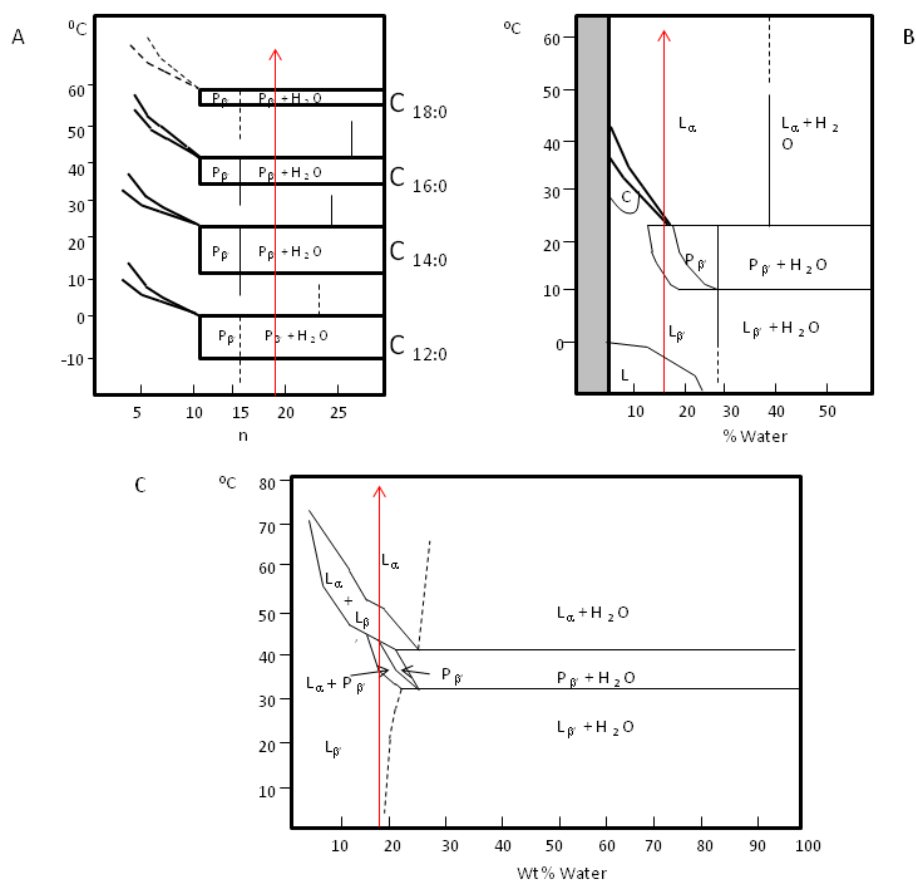

Figure S1:A) Generalised phase behaviour for phosphocholine phospholipids with lipid chain length C12-18.  $n$  represents the mol ratio of water to lipid molecules.<sup>1</sup> B) and C) The binary lipid-water phase diagram of bulk DMPC<sup>2</sup> and DPPC<sup>3</sup>, respectively. The red line represents the composition at which PALS measurements were made with increasing temperature.

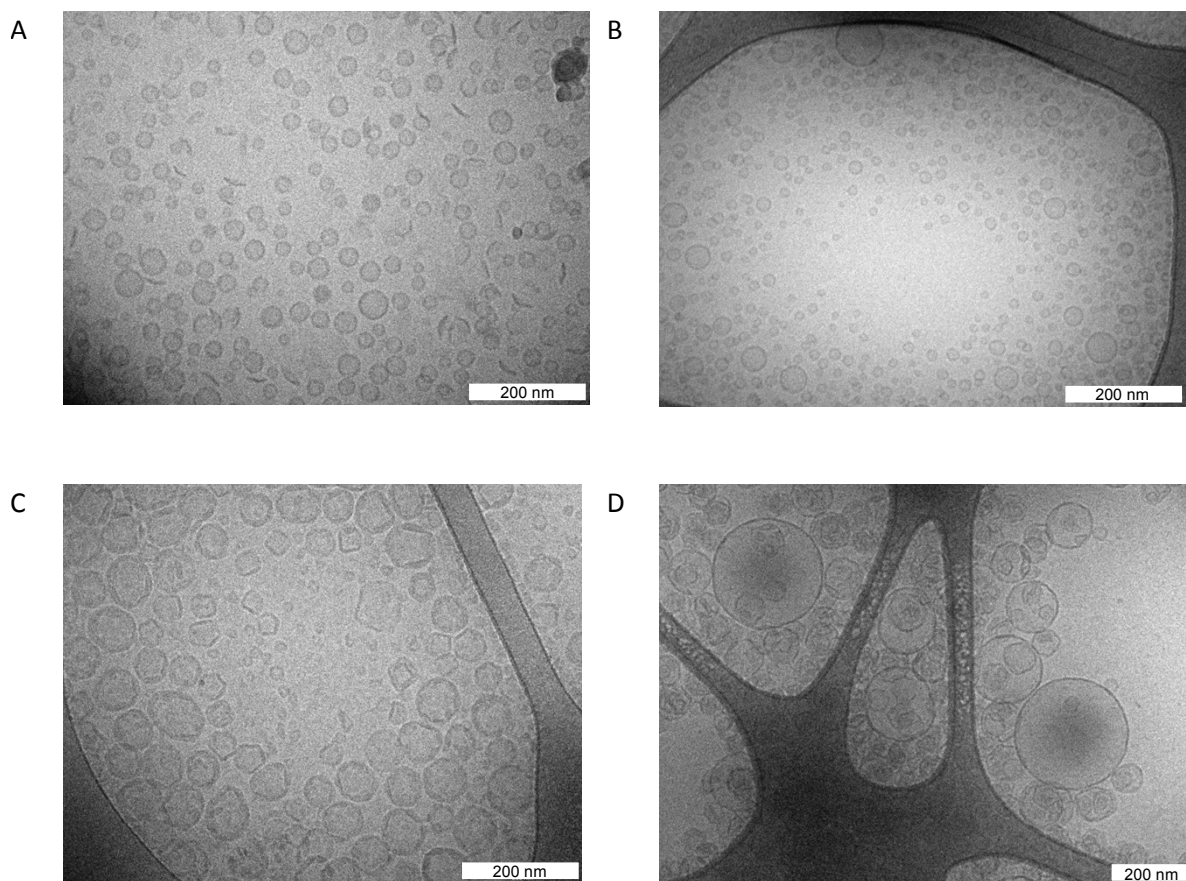

Figure S2: Cryo-TEM images of the liposome samples for A) DLPC, B) DOPC, C) DPPC and D) DSPC.

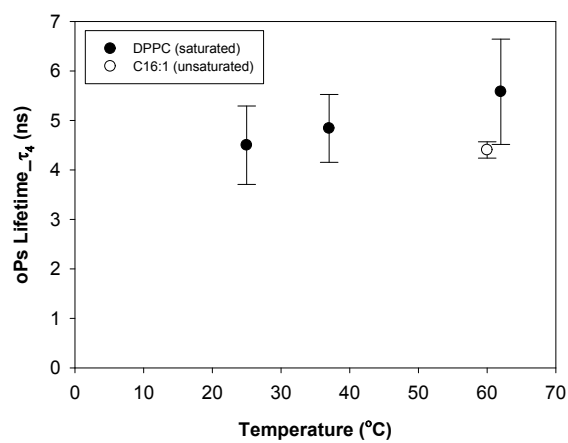

Figure S3: oPs lifetime in the organic region ( $\tau_4$ ) for DPPC and its corresponding unsaturated lipid (C16:1) as a function of temperature.

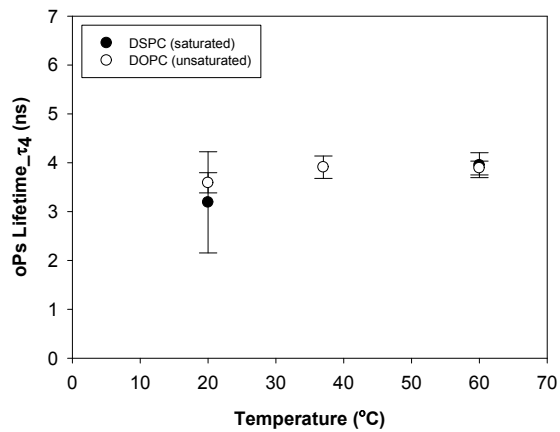

Figure S4: oPs lifetime in the organic region ( $\tau_4$ ) for DSPC and DOPC as a function of temperature.

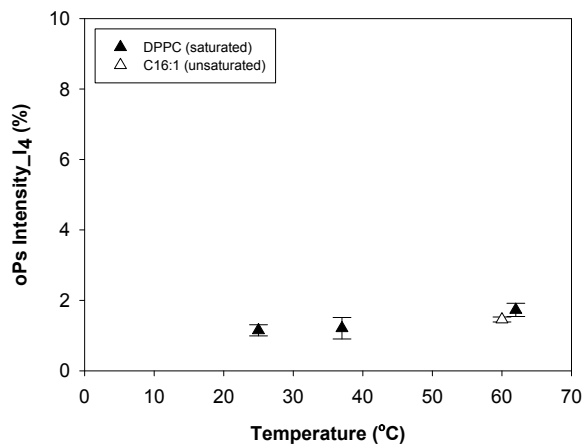

Figure S5: oPs intensity in the organic region ( $I_4$ ) for DPPC and its corresponding unsaturated lipid (C16:1) as a function of temperature.

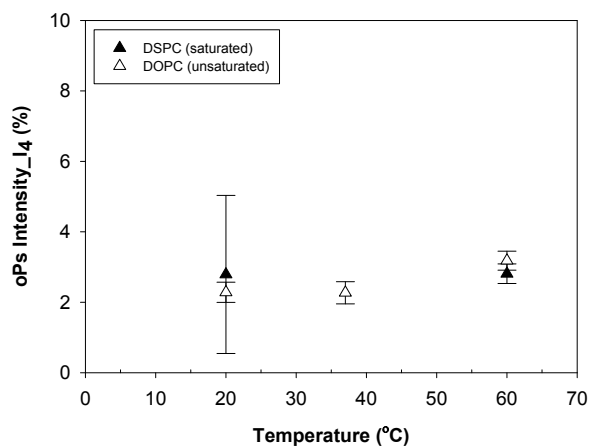

Figure S6: oPs intensity in the organic region ( $I_4$ ) for DPPC and DOPC as a function of temperature.

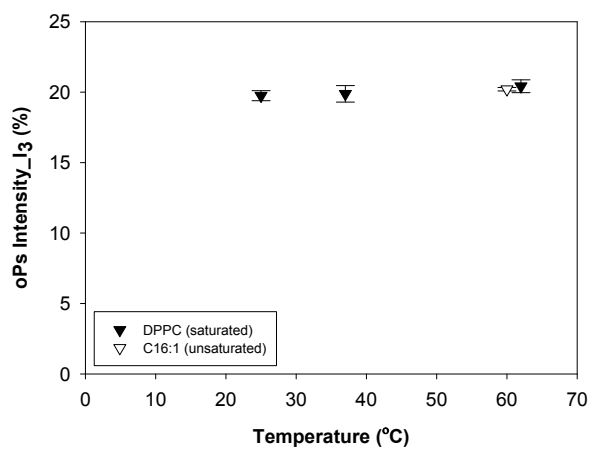

Figure S7: oPs intensity in the aqueous region ( $I_3$ ) for DPPC and its corresponding unsaturated lipid (C16:1) as a function of temperature.

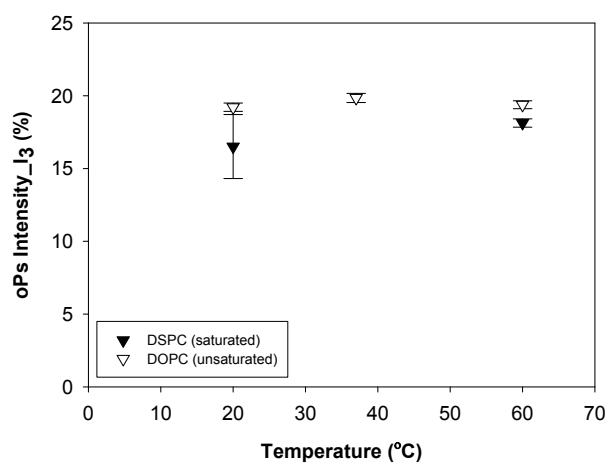

Figure S8: oPs intensity in the aqueous region ( $I_3$ ) for DSPC and DOPC as a function of temperature.

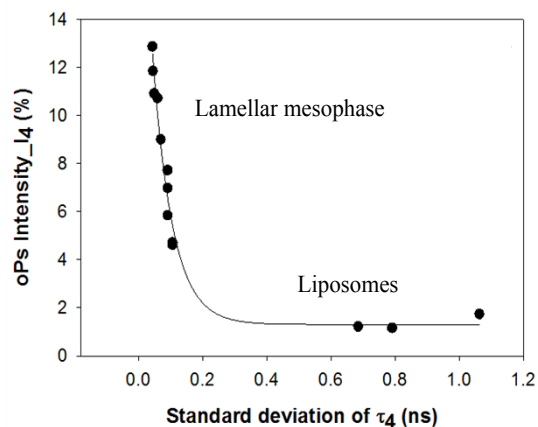

Figure S9:  $I_4$  versus standard deviation of  $\tau_4$  for the lamellar mesophase and liposomes of DPPC. The plot shows that reducing oPs intensity values ( $I_4$ ) results in increasing uncertainties for the corresponding oPs lifetime ( $\tau_4$ ).

### References

1. M. J. Janiak, D. M. Small and G. G. Shipley, *Journal of Biological Chemistry*, 1979, **254**, 6068-6078.
2. M. Hamm and M. M. Kozlov, *European Physical Journal B*, 1998, **6**, 519-528.
3. P. M. Duesing, R. H. Templer and J. M. Seddon, *Langmuir*, 1997, **13**, 351-359.
